# Supplementary material for: Radiolabeling polymeric micelles for in vivo evaluation: a novel, fast, and facile method
Source: Springer Nature journal article supplement (doi:10.1186/s13550-016-0167-x), 2016-02-09
Supplement: MOESM1 [file 9786478]

## ADDITIONAL INFORMATION

### Distribution ratio of indium-tropolone at pH 4.5 to 8.5

**Table a1. The distribution ratio (*D*) at pH 4.5 to 8.5, each value for *D* is an average and standard deviation of three measurements.**

| <b>pH</b> | <b><i>D</i></b> |
|-----------|-----------------|
| 4.5       | $4.7 \pm 0.4$   |
| 5.5       | $4.5 \pm 0.5$   |
| 6.5       | $4.8 \pm 0.5$   |
| 7.4       | $4.8 \pm 0.5$   |
| 8.5       | $2.9 \pm 0.2$   |
