# Supplementary material for: Radiolabeling polymeric micelles for in vivo evaluation: a novel, fast, and facile method
Source: Springer Nature journal article supplement (doi:10.1186/s13550-016-0167-x), 2016-02-09
Supplement: MOESM3 [file 9786478]

## ADDITIONAL INFORMATION

**Graphical representation of the effect of the indium activity on the radiolabeling efficiency**

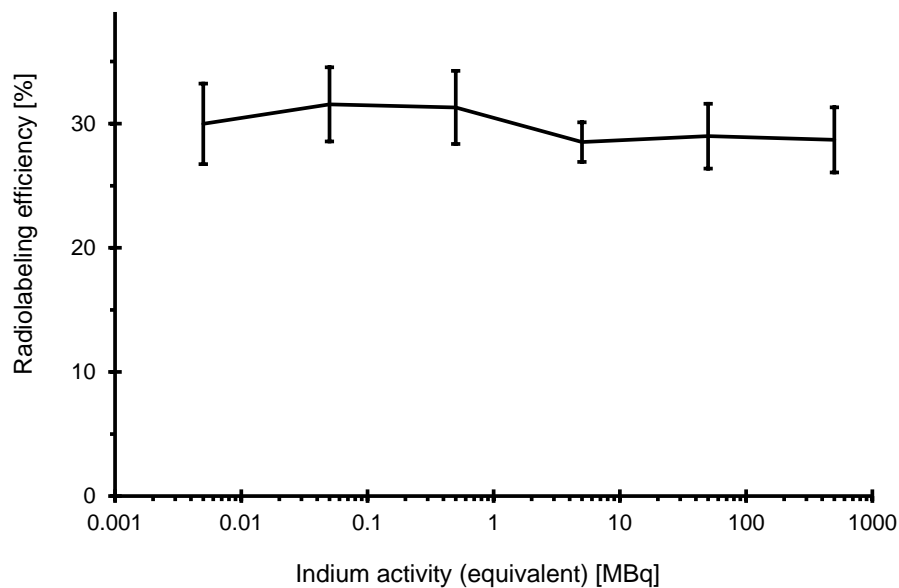

**Figure a1. The labeling efficiency as function of the indium activity.** The samples were prepared in HEPES buffer pH 7.4 with 0.8 mM tropolone and 50 kBq  $^{111}\text{In}$  activity, with the exception of the lowest data point, for which 5 kBq was used, containing 4.3 mg/mL PS-b-PEO micelles. Increasing amounts of non-radioactive indium has been added equivalent to an  $^{111}\text{In}$  activity up to 500 MBq. The uncertainty bars are the standard deviations (N=3).
