# Supplementary material for: Radiolabeling polymeric micelles for in vivo evaluation: a novel, fast, and facile method
Source: Springer Nature journal article supplement (doi:10.1186/s13550-016-0167-x), 2016-02-09
Supplement: MOESM4 [file 9786478]

## ADDITIONAL INFORMATION

### Speciation chart of indium over the full pH range

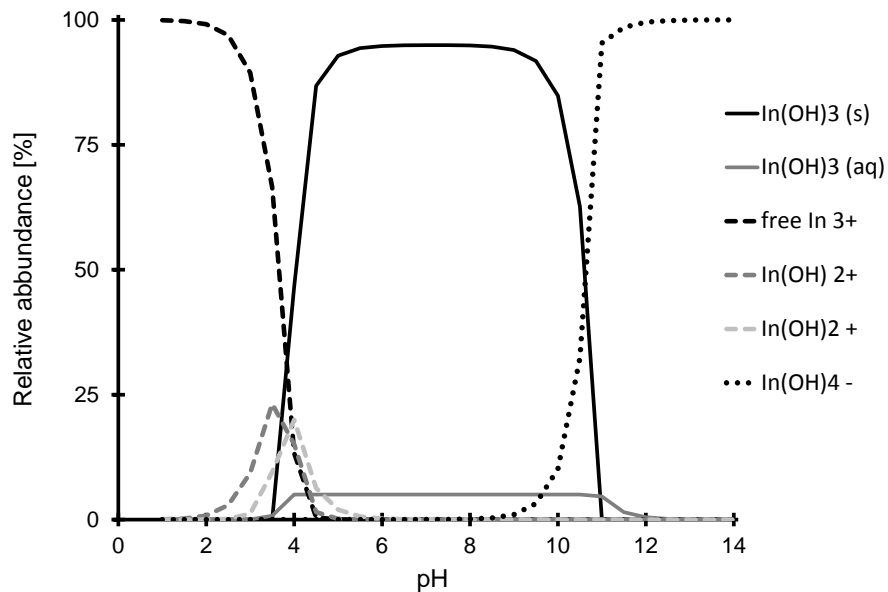

**Figure a2.** Speciation chart of indium at a concentration of 1  $\mu\text{M}$ . The speciation chart is created with CHEAQS Next software version 2014.0.9.4. Input values for the concentration of both indium and chloride are  $1 \times 10^{-6}$  M, and for each pH the regarding  $\text{H}^+$  input value has been set as free activity, the concentration of all other elements has been set to 0 M for this evaluation.
